# Supplementary material
Source: publisher figshare collection journal article supplement (https://acs.figshare.com/ndownloader/files/5116312)
Supplement: Supplementary file 1 [file 5116312]

# Supporting Information

## **Microwave-assisted Intramolecular Suzuki-Miyaura Reaction to Macrocycle, a Concise Asymmetric Total Synthesis of Biphenomycin B**

By Renaud Lépine, Jieping Zhu\*

*Institut de Chimie des Substances Naturelles, CNRS, 91198 Gif-sur-Yvette Cedex, France*

|     |                                                                     |
|-----|---------------------------------------------------------------------|
| S2  | General information                                                 |
| S3  | Synthesis and physical data of compound <b>20</b>                   |
| S4  | Synthesis and physical data of biphenomycin B                       |
| S6  | <sup>1</sup> H NMR Spectra of 5, 6, 7, 19, 4, 20 and biphenomycin B |
| S14 | <sup>13</sup> C NMR Spectra of 5, 6, 7, 4, and 20                   |
| S18 | HMQC NMR spectra of biphenomycin B                                  |
| S19 | HMBC NMR spectra of biphenomycin B                                  |
| S20 | HPLC analysis of 20                                                 |
| S21 | HPLC analysis of biphenomycin B                                     |

## General information

Melting points were recorded using Reichert melting point apparatus.

Mass spectra were obtained either from an AEI MS-50 instrument using electron impact ionization (EI), from an AEI MS-9 using electron spray (ES), or from a MALDI-TOF type of instrument for the high resolution mass spectra (HRMS).

Proton NMR ( $^1\text{H}$ ) spectra were at 500 MHz or 300 MHz spectrometer. Carbon NMR ( $^{13}\text{C}$ ) spectra were similarly recorded at 125 or 75 MHz spectrometer, using a broadband decoupled mode with the multiplicities obtained using a JMOD or DEPT sequence.

Chemical shifts ( $\delta$ ) are reported in parts per million (ppm) from tetramethylsilane. NMR experiments were carried out in  $\text{CDCl}_3$ , or  $\text{D}_2\text{O}$ . The following abbreviations are used for the multiplicities: s: singlet, d: doublet, t: triplet, q: quartet, m: multiplet, brs: broad singlet for proton spectra. Coupling constants ( $J$ ) are reported in Hertz (Hz).

Infrared spectra were recorded on a Nicolet 205 FT-IR spectrometer.

Flash chromatography was performed using Kieselgel Si 60, 40-63  $\mu\text{m}$  particle sized silica gel (200-400 mesh). Visualization was achieved under a UVP mineralight UVGL-58 lamp, and by developing the plates with Dragendorff's reagent or potassium permanganate ( $\text{KMnO}_4$ ).

Microwave experiments were conducted using a Discover microwave reactor from CEM. All experiments were performed in sealed tubes (capacity 10mL) under argon atmosphere. The temperature of the contents of the vessel was monitored using a calibrated infrared temperature control mounted under the reaction vessel. Microwave irradiation of 20W was used, the temperature being ramped from room temperature to  $110^\circ\text{C}$  in 2 minutes. Once this temperature was reached, the reaction mixture was held at  $110^\circ\text{C}$  for 30 minutes.

All reagents were obtained from commercial suppliers unless otherwise stated.

### Synthesis and physical data of Compound 20:

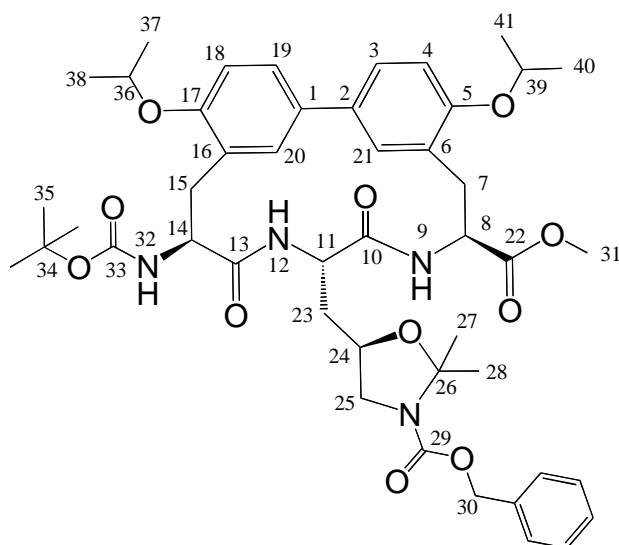

In a 10-mL glass tube were placed the linear tripeptide **4** (11.3 mg, 0.0103 mmol), 5.0 mL of degassed toluene, 1.0 mL of distilled water, K<sub>2</sub>CO<sub>3</sub> (8.8 mg, 0.072 mmol), a catalytic amount of tetrabutylammonium bromide (one crystal), catalyst **24** (0.61mg, 0.00061 mmol), and a magnetic stir bar. The vessel was sealed with a septum and placed into the microwave cavity. Microwave irradiation of 20W was used, the temperature being ramped from room temperature to 110°C. Once 110°C was reached, the reaction mixture was held at this temperature for 30 min. After being cooled to room temperature, the reaction mixture was diluted by addition of water and the aqueous phase was extracted with ethyl acetate. The combined organic extracts were washed with brine, dried over Na<sub>2</sub>SO<sub>4</sub>, filtered and evaporated to dryness under reduced pressure. This crude residue was purified by column chromatography on silica gel (eluant: CH<sub>2</sub>Cl<sub>2</sub>/Acetone = 9/1) to give protected biphenomycin B **20** as a white solid (4.3 mg, 50% yield).

**mp** = 238°C

**α<sub>D</sub>** = + 1.6 (*c* 1.4, CHCl<sub>3</sub>)

**IR** ν 3271, 2972, 2926, 1744, 1709, 1648, 1486 cm<sup>-1</sup>.

**$^1\text{H}$  NMR** ( $\text{CDCl}_3$ , 500MHz)  $\delta$  (ppm) 1.25 (d, 3H,  $J = 6.0$  Hz), 1.27 (d, 3H,  $J = 6.0$  Hz), 1.28 (d, 3H,  $J = 6.0$  Hz), 1.32 (d, 3H,  $J = 6.0$  Hz), 1.36 (s, 9H), 1.45, 1.49 (brs, 6H), 1.89-1.94 (m, 2H), 2.85-2.88 (dd, 1H,  $J = 3.1$  and 14.8 Hz), 2.96-3.05 (m, 1H), 3.04-3.09 (m, 1H), 3.31-3.35 (m, 2H), 3.69-3.70 (m, 1H), 3.72 (s, 3H), 4.11-4.17 (m, 1H), 4.35-4.38 (m, 1H), 4.46 (septet, 1H,  $J = 6$  Hz), 4.50 (septet, 1H,  $J = 6.3$  Hz), 4.67-4.73 (m, 1H), 4.87-4.91 (m, 1H), 5.00-5.08 (m, 2H), 5.36-5.42 (m, 1H), 6.47-6.51 (m, 1H), 6.67-6.72 (m, 1H), 6.76 (d, 1H,  $J = 2.8$  Hz), 6.78 (d, 1H,  $J = 2.5$  Hz), 7.06 (brd, 1H), 7.18 (brd, 1H), 7.22-7.32 (m, 7H).

**$^{13}\text{C}$  NMR** ( $\text{CDCl}_3$ , 125 MHz)  $\delta$  (ppm) 22.1, 22.2, 22.3 (2C), 24.2, 26.2, 28.4 (3C), 30.1, 31.4, 37.2, 50.2, 50.6, 51.9, 52.6, 54.9, 66.5, 70.1, 70.7 (2C), 79.6, 94.3, 113.0, 113.4, 124.5, 124.9, 125.6, 125.9, 127.9 (2C), 128.0 (2C), 128.1, 128.5, 128.7, 131.7, 131.9, 136.7, 152.1, 154.6, 154.7, 155.3, 170.3, 170.8, 171.9.

**MS** ( $\text{ESI}^+$ )  $m/z$  867 ( $\text{M} + \text{Na}^+$ )

**HRMS** ( $\text{ESI}^+$ )  $m/z$  calculated for  $\text{C}_{46}\text{H}_{60}\text{N}_4\text{O}_{11}$  ( $\text{M} + \text{Na}^+$ ) 867.4156, found 867.4134.

## Synthesis and physical data of Biphenomycin B.

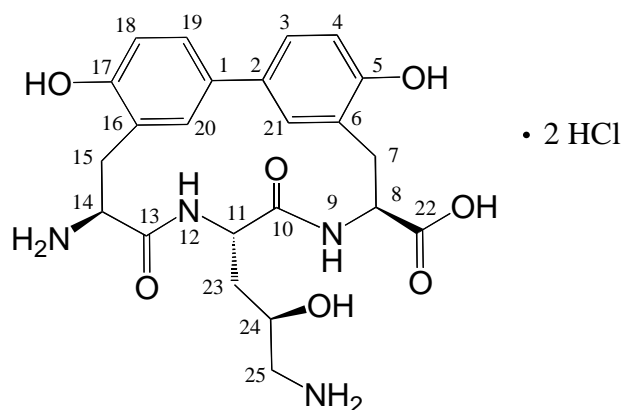

To a solution of fully protected biphenomycin B (25.6 mg, 0.03 mmol) in dichloromethane (0.6 ml) cooled to  $0^\circ\text{C}$ , was added boron trichloride (1M solution in dichloromethane, 0.6 ml, 0.6 mmol). The mixture was stirred under argon atmosphere for 4 hours. Then, the solution was quenched with dry methanol and the volatiles were removed *in vacuo*. The crude product was dissolved in a mixture of dioxane and water (1/1). Then, a

solution of 2N lithium hydroxide in water (0.15 ml, 0.15 mmol) was added. After 24 hours of stirring at room temperature, the mixture was quenched with a 0.2 N solution of KHSO<sub>4</sub>. Dioxane and water were then removed under reduced pressure. The crude product was purified by HPLC (column symmetry shield C18 4.6\*150mm, water + 0.1%TFA/ acetonitrile + 0.1%TFA = 85/15; retention time = 7.37 min.) to give after salt formation the **biphenomicyn B.2HCl** as a white solid (16 mg, 95% yield)

$\alpha_D = +4.3$  (*c* 3.0, 1N HCl)

**IR**  $\nu$  2957, 1732, 1719, 1638, 1615, 1545, 1499, 1441 cm<sup>-1</sup>.

**<sup>1</sup>H NMR** (D<sub>2</sub>O, 500MHz)  $\delta$  (ppm) 1.97-2.03 (m, 1H, H<sub>23'</sub>), 2.10-2.17 (m, 1H, H<sub>23</sub>), 2.85 (dd, 1H, *J* = 16.0 and 11.3 Hz, H<sub>7'</sub>), 3.03 (dd, 1H, *J* = 13.0 and 9.8 Hz, H<sub>25'</sub>), 3.20 (dd, 1H, *J* = 15.1 and 2.8 Hz, H<sub>15'</sub>), 3.23 (dd, 1H, *J* = 13.0 and 2.8 Hz, H<sub>25</sub>), 3.55 (dd, 1H, *J* = 16.0 and 1.9 Hz, H<sub>7</sub>), 3.70 (dd, 1H, *J* = 15.1 and 5.0 Hz, H<sub>15</sub>), 4.05 (m, 1H, H<sub>24</sub>), 4.56 (dd, 1H, *J* = 5.0 and 2.8 Hz, H<sub>14</sub>), 4.63 (dd, 1H, *J* = 11.3 and 1.9 Hz, H<sub>8</sub>), 4.97 (dd, 1H, *J* = 9.8 and 6.0 Hz, H<sub>11</sub>), 7.04 (d, 1H, *J* = 8.0 Hz, H<sub>4</sub>), 7.06 (d, 1H, *J* = 8.2 Hz, H<sub>18</sub>), 7.11 (d, 1H, *J* = 2.2 Hz, H<sub>20</sub>), 7.45 (brs, 1H, H<sub>21</sub>), 7.47 (dd, 1H, *J* = 8.0 and 1.9 Hz, H<sub>3</sub>), 7.54 (dd, 1H, *J* = 8.2 and 2.2 Hz, H<sub>19</sub>).

**<sup>13</sup>C NMR** (D<sub>2</sub>O, 125 MHz)  $\delta$  (ppm) 29.0 (C7), 29.8 (C15), 37.1 (C23), 45 (C25), 50.8 (C11), 54.8 (C14), 56.2 (C8), 64.8 (C24), 116.2 (C4 and C18), 120.0 (C16), 125.0 (C3 and C1), 126.5 (C6 and C19), 127.6 (C21), 130.4 (C20), 132.4 (C2), 152.8 (C5), 154.4 (C17), 168.8 (C13), 172.2 (C10), 178.8 (C22).

**MS** (MALD<sup>+</sup>-TOF) *m/z* 473 (M-2HCl+H<sup>+</sup>), 495 (M-2HCl+Na<sup>+</sup>), 511 (M-2HCl+K<sup>+</sup>)

**HRMS** (MALD<sup>+</sup>-TOF) *m/z* calculated for C<sub>23</sub>H<sub>29</sub>N<sub>4</sub>O<sub>7</sub> (M-2HCl+H<sup>+</sup>) 473.2036, found 473.2053.

**Compound 5:**  
in CDCl<sub>3</sub> (300MHz)

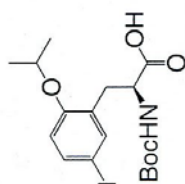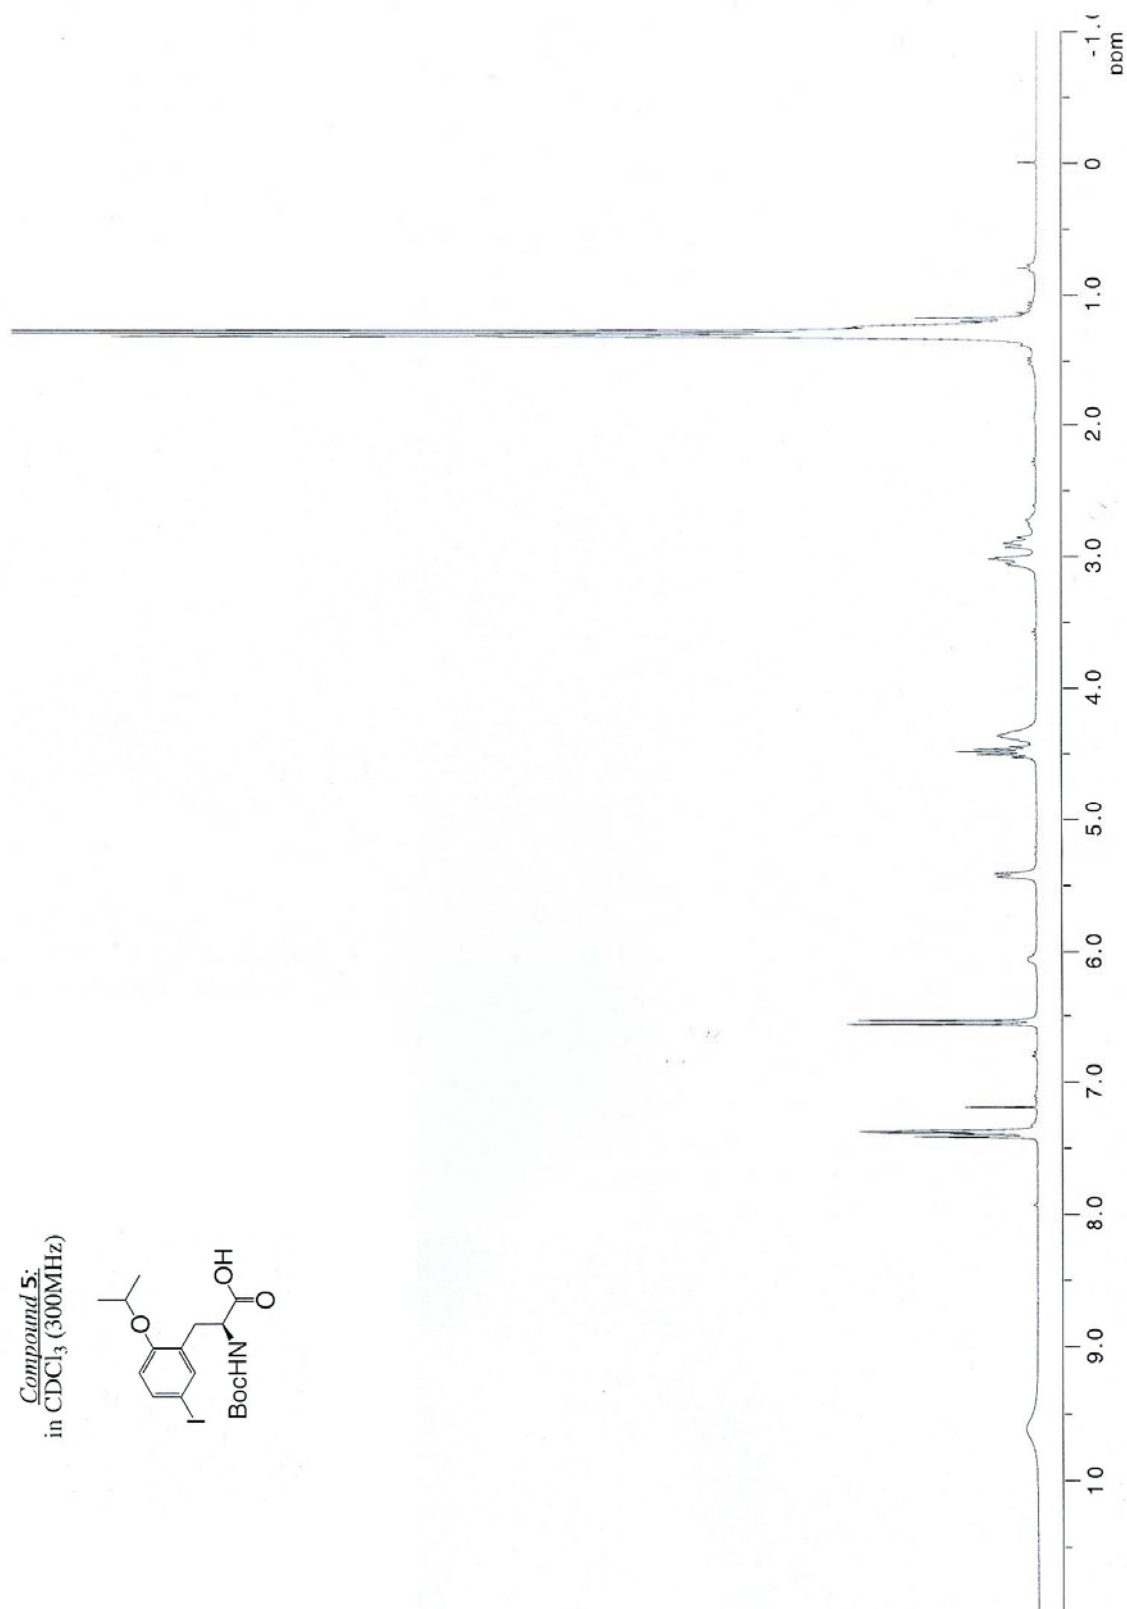

*Compound 6:*  
in CDCl<sub>3</sub> (300MHz)

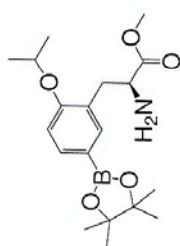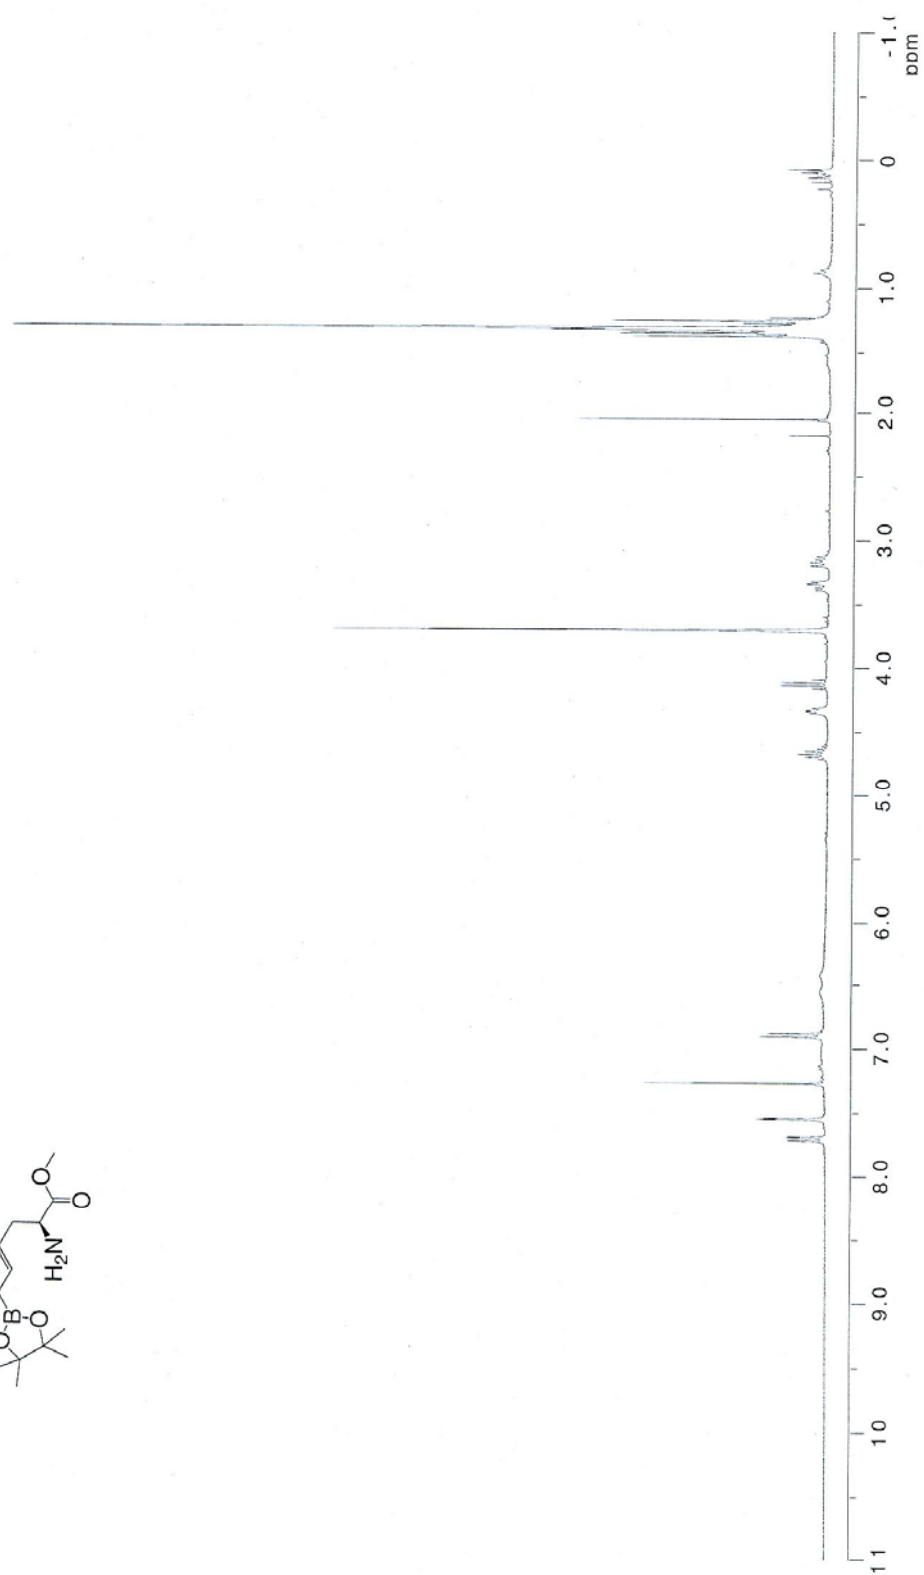

Compound **Z**:  
in CDCl<sub>3</sub> (250MHz)

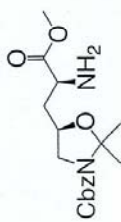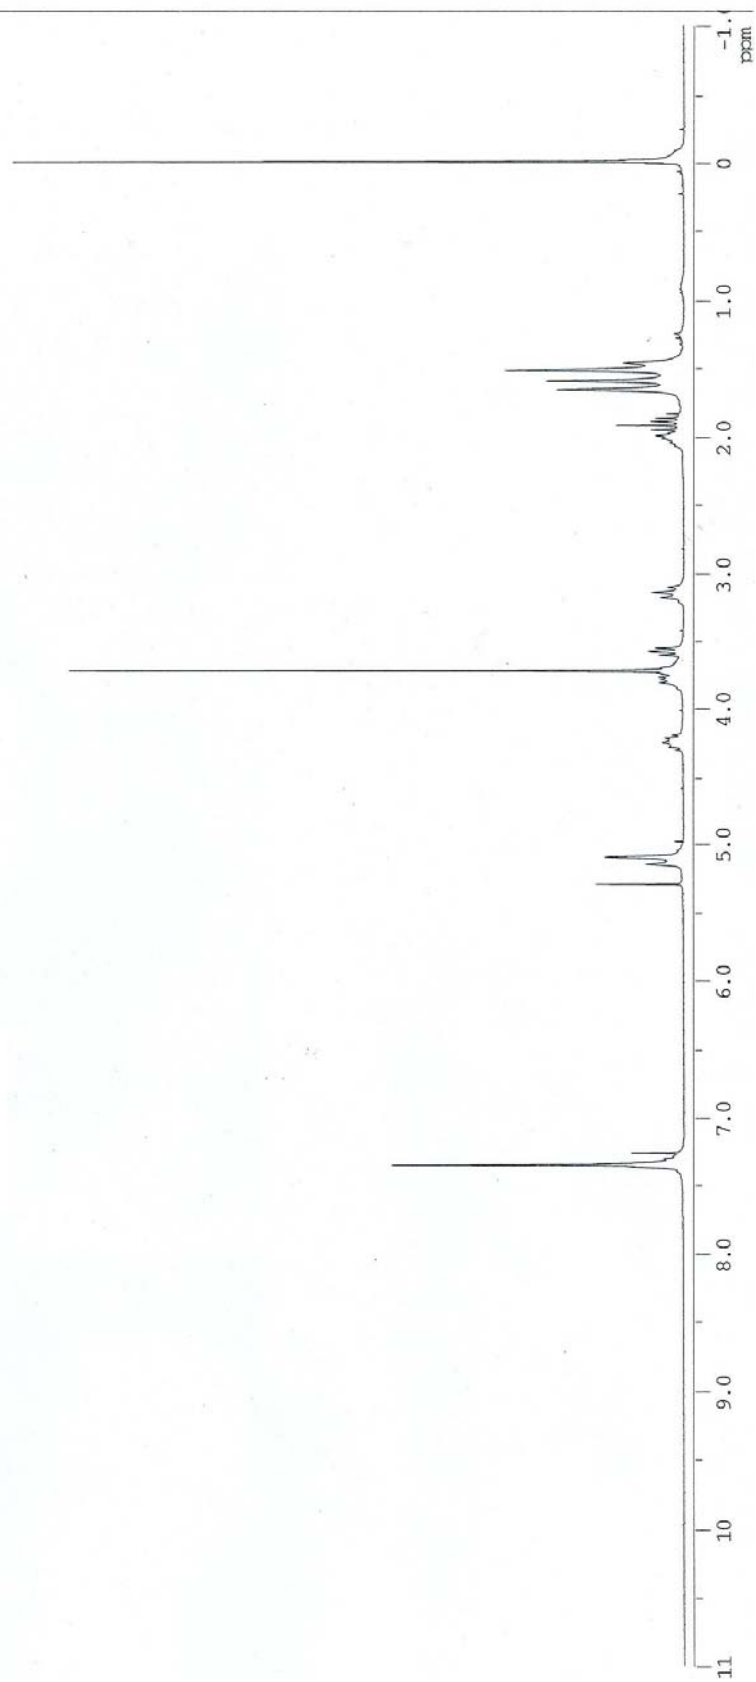



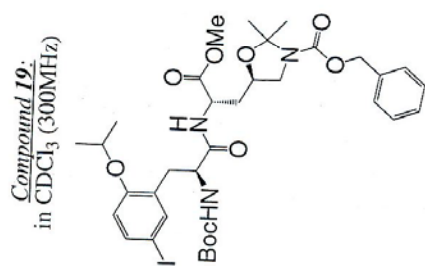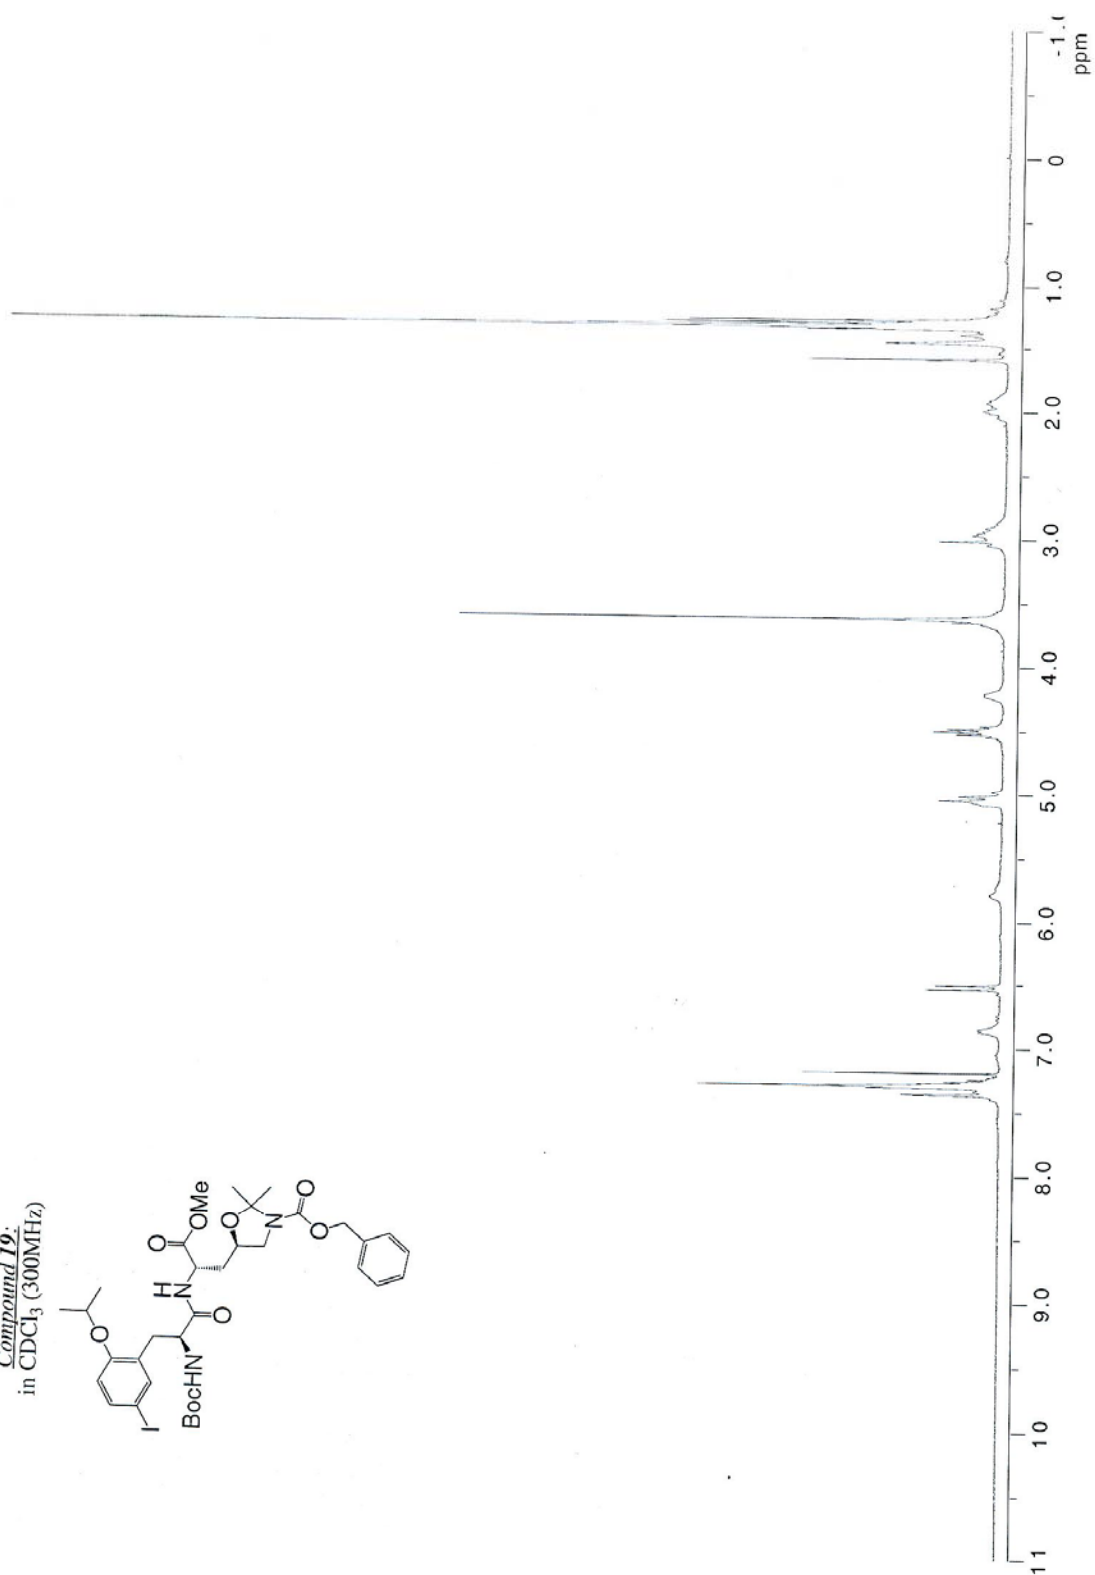



*Protected Biphenomycine B 20 :*  
in CDCl<sub>3</sub> (500 MHz)

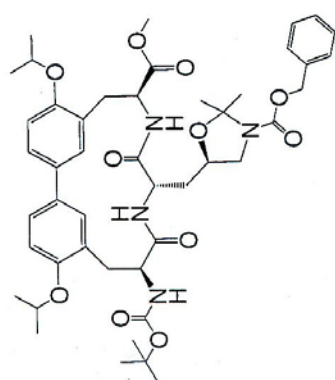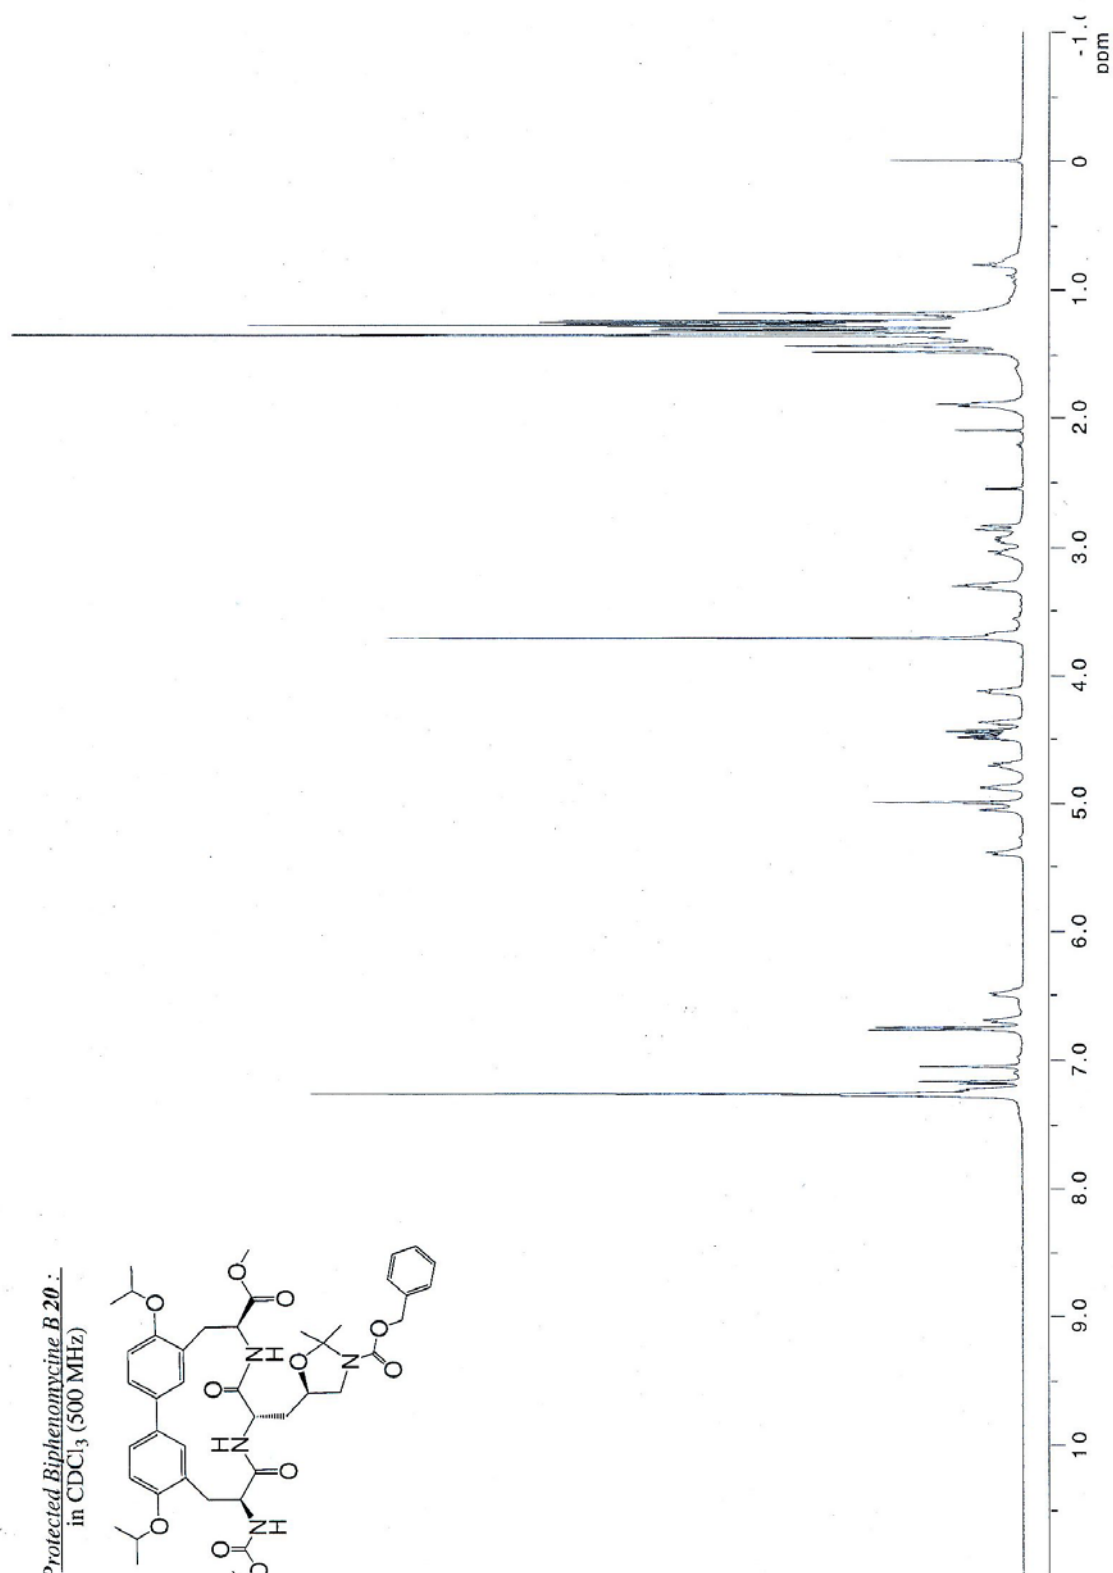

Biphenomycine B. 2 HCl :-  
in D<sub>2</sub>O (500 MHz)

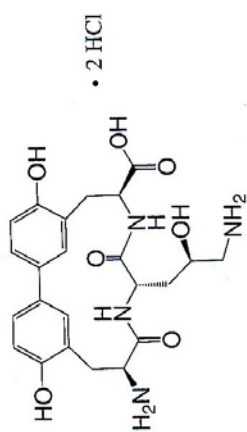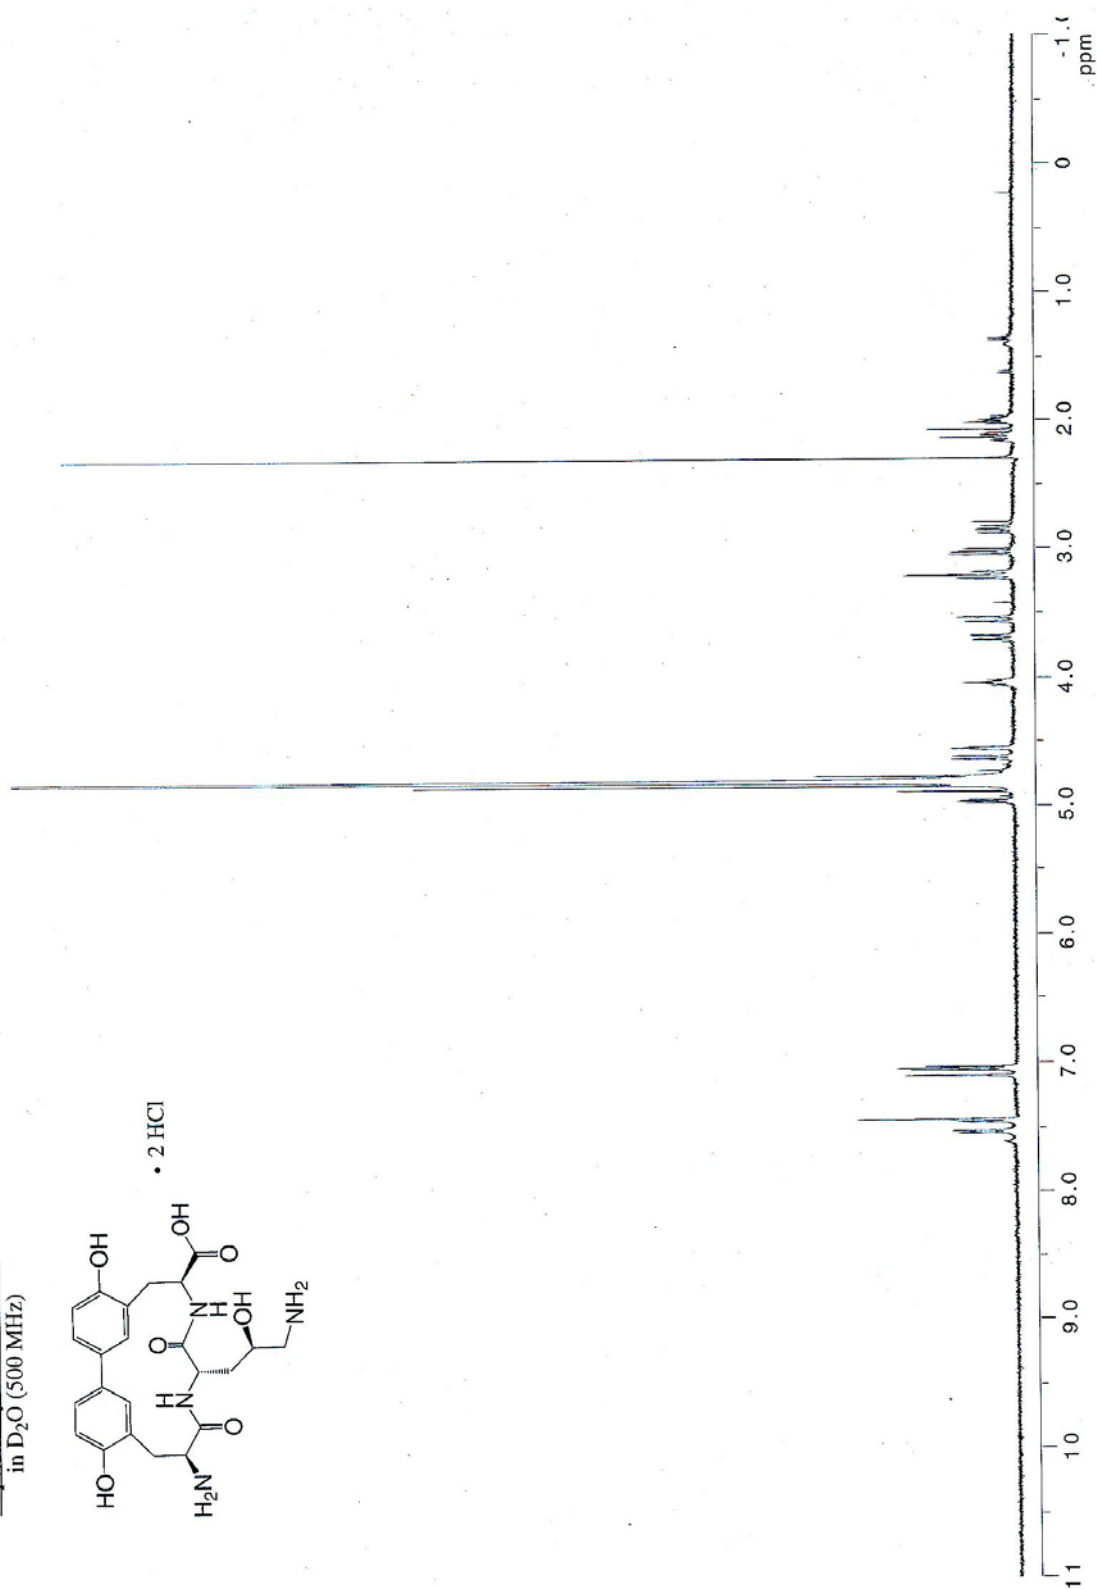

Biphenomycine B  $\cdot$  2 HCl :  
in D<sub>2</sub>O (500 MHz)

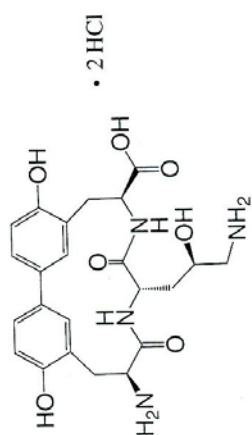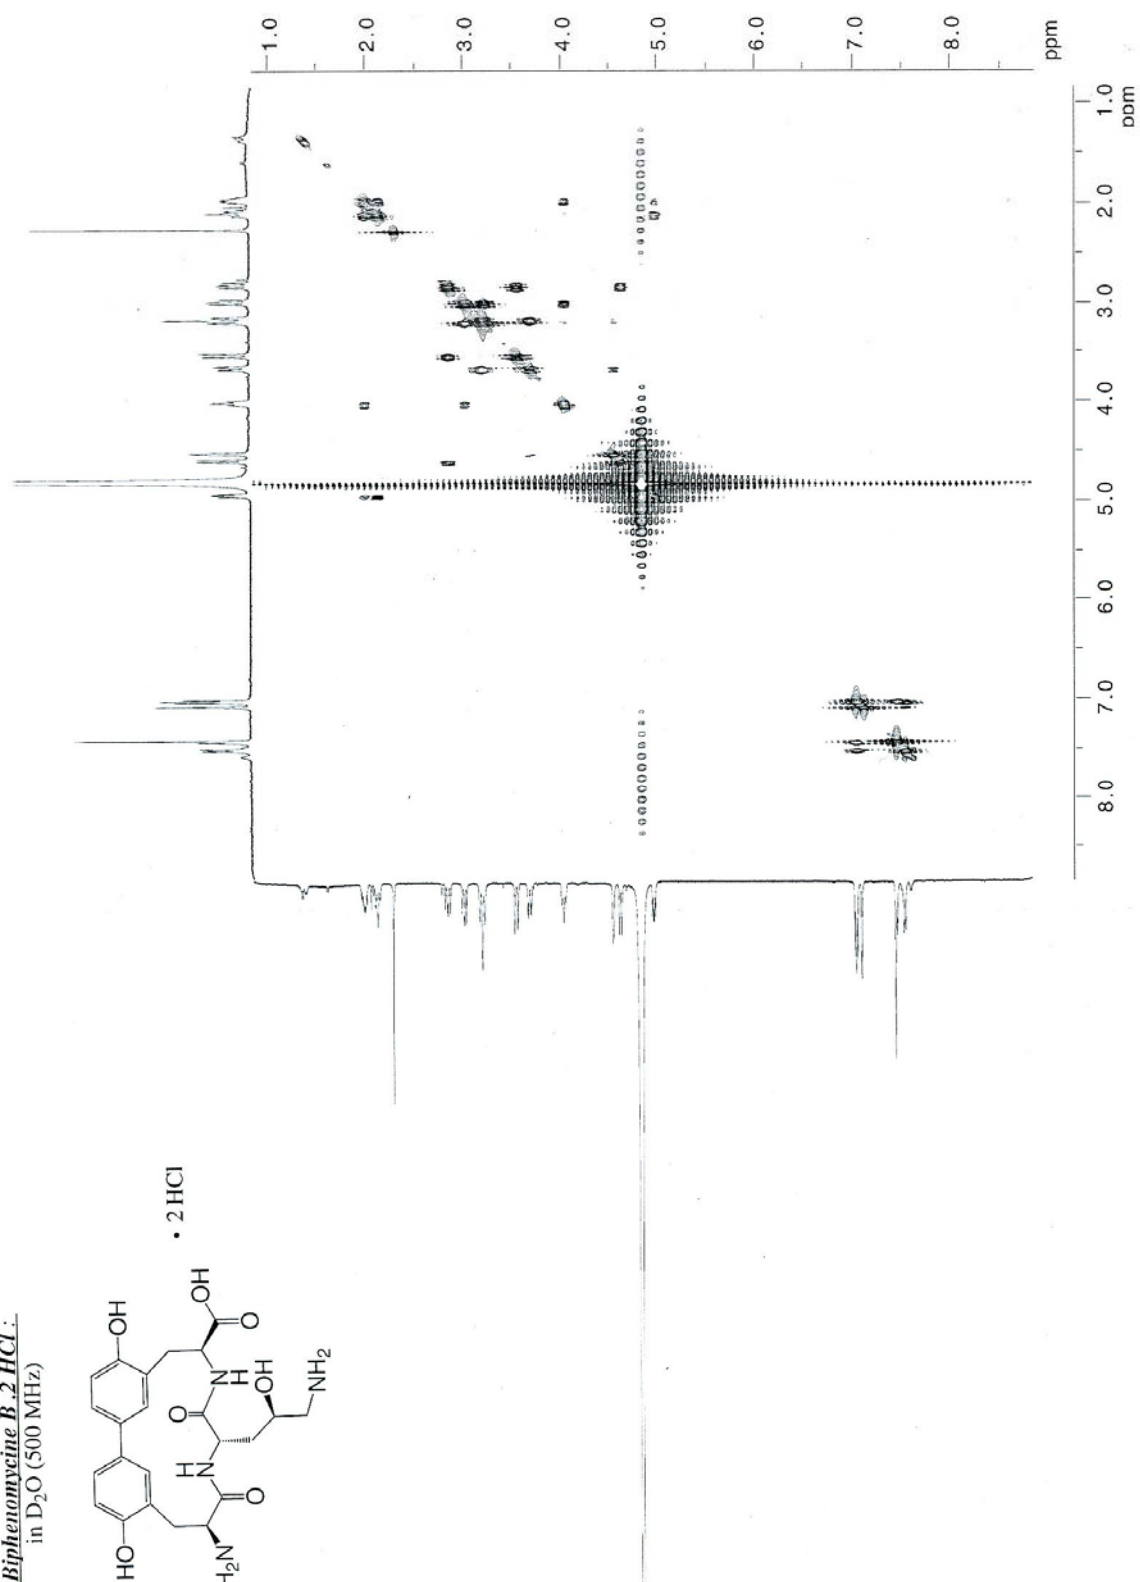

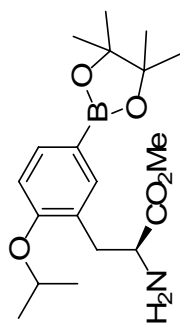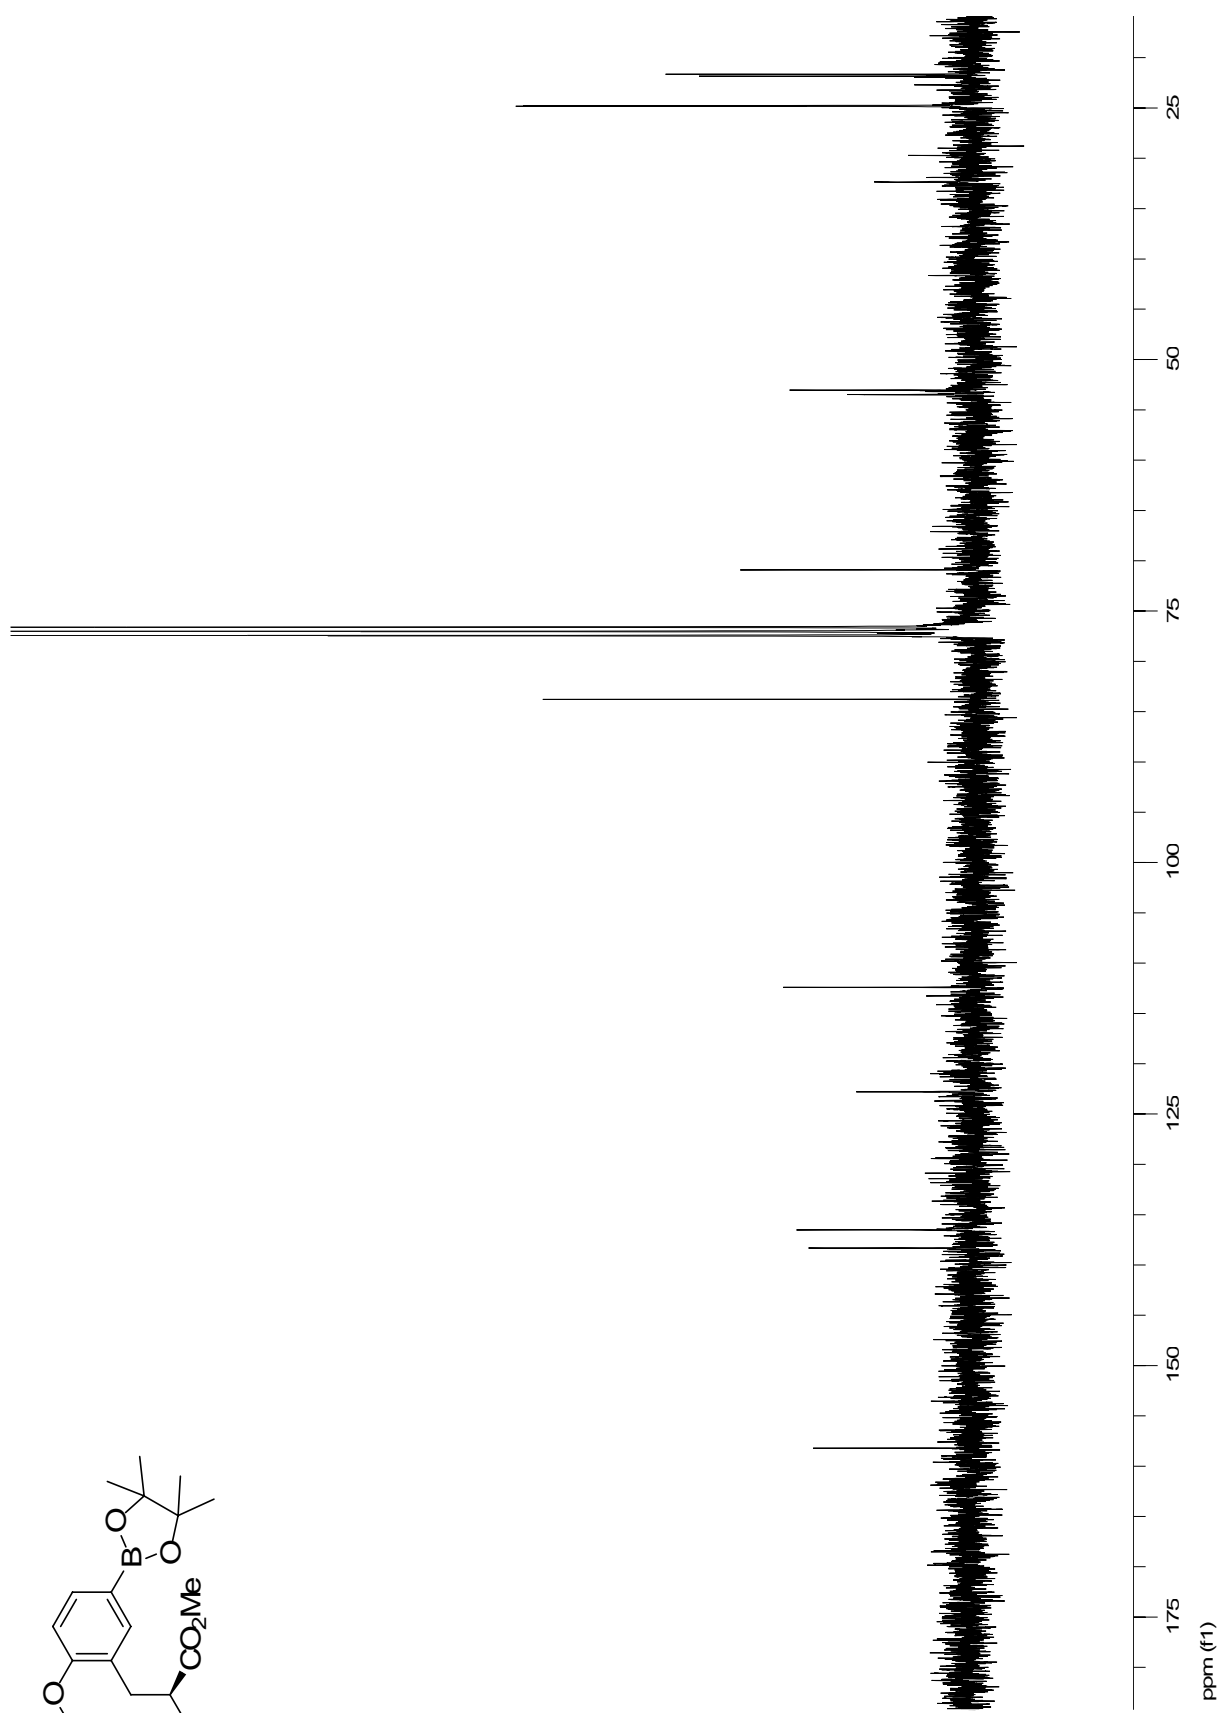

Compound **7i**:  
in CDCl<sub>3</sub> (250MHz)

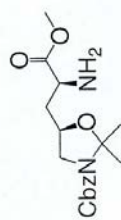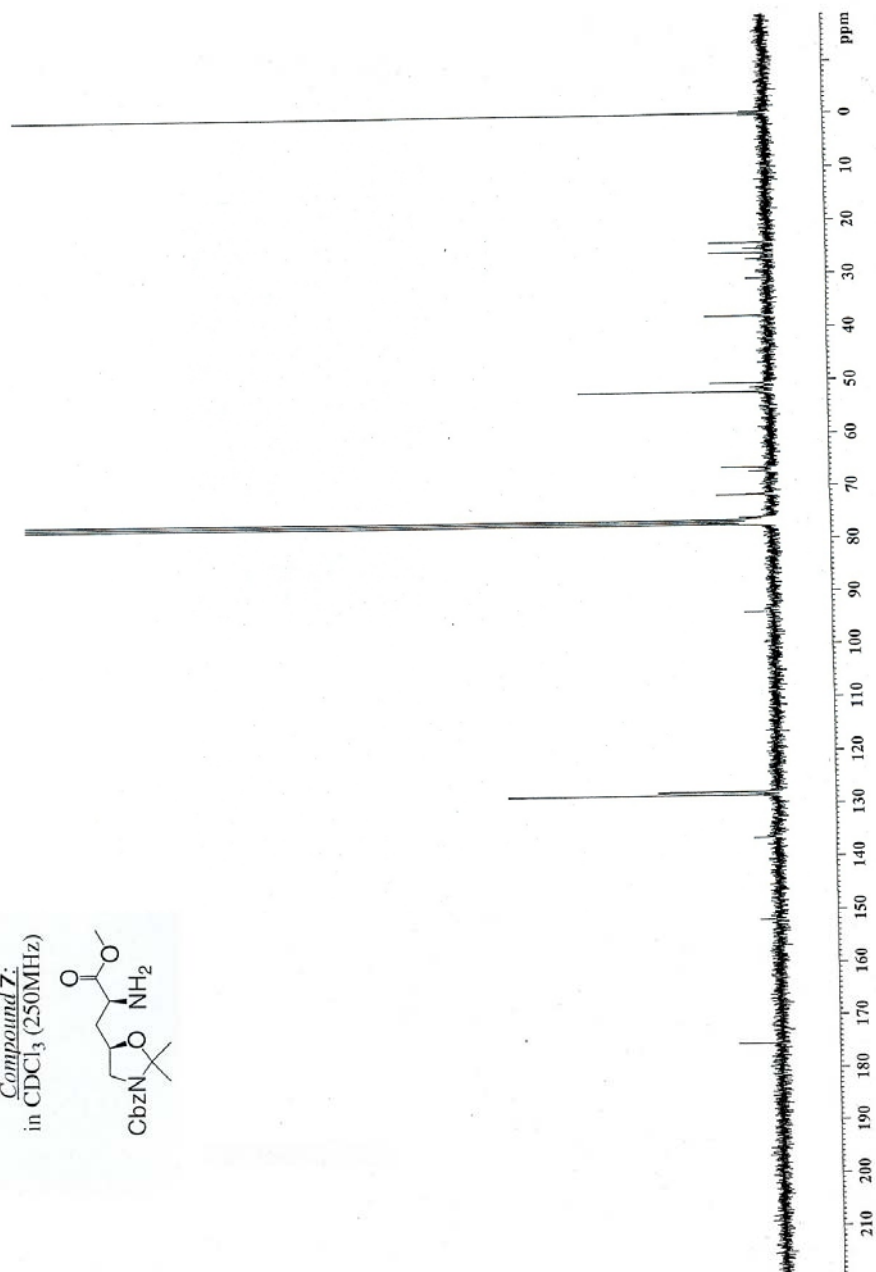

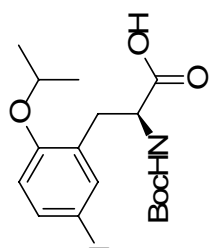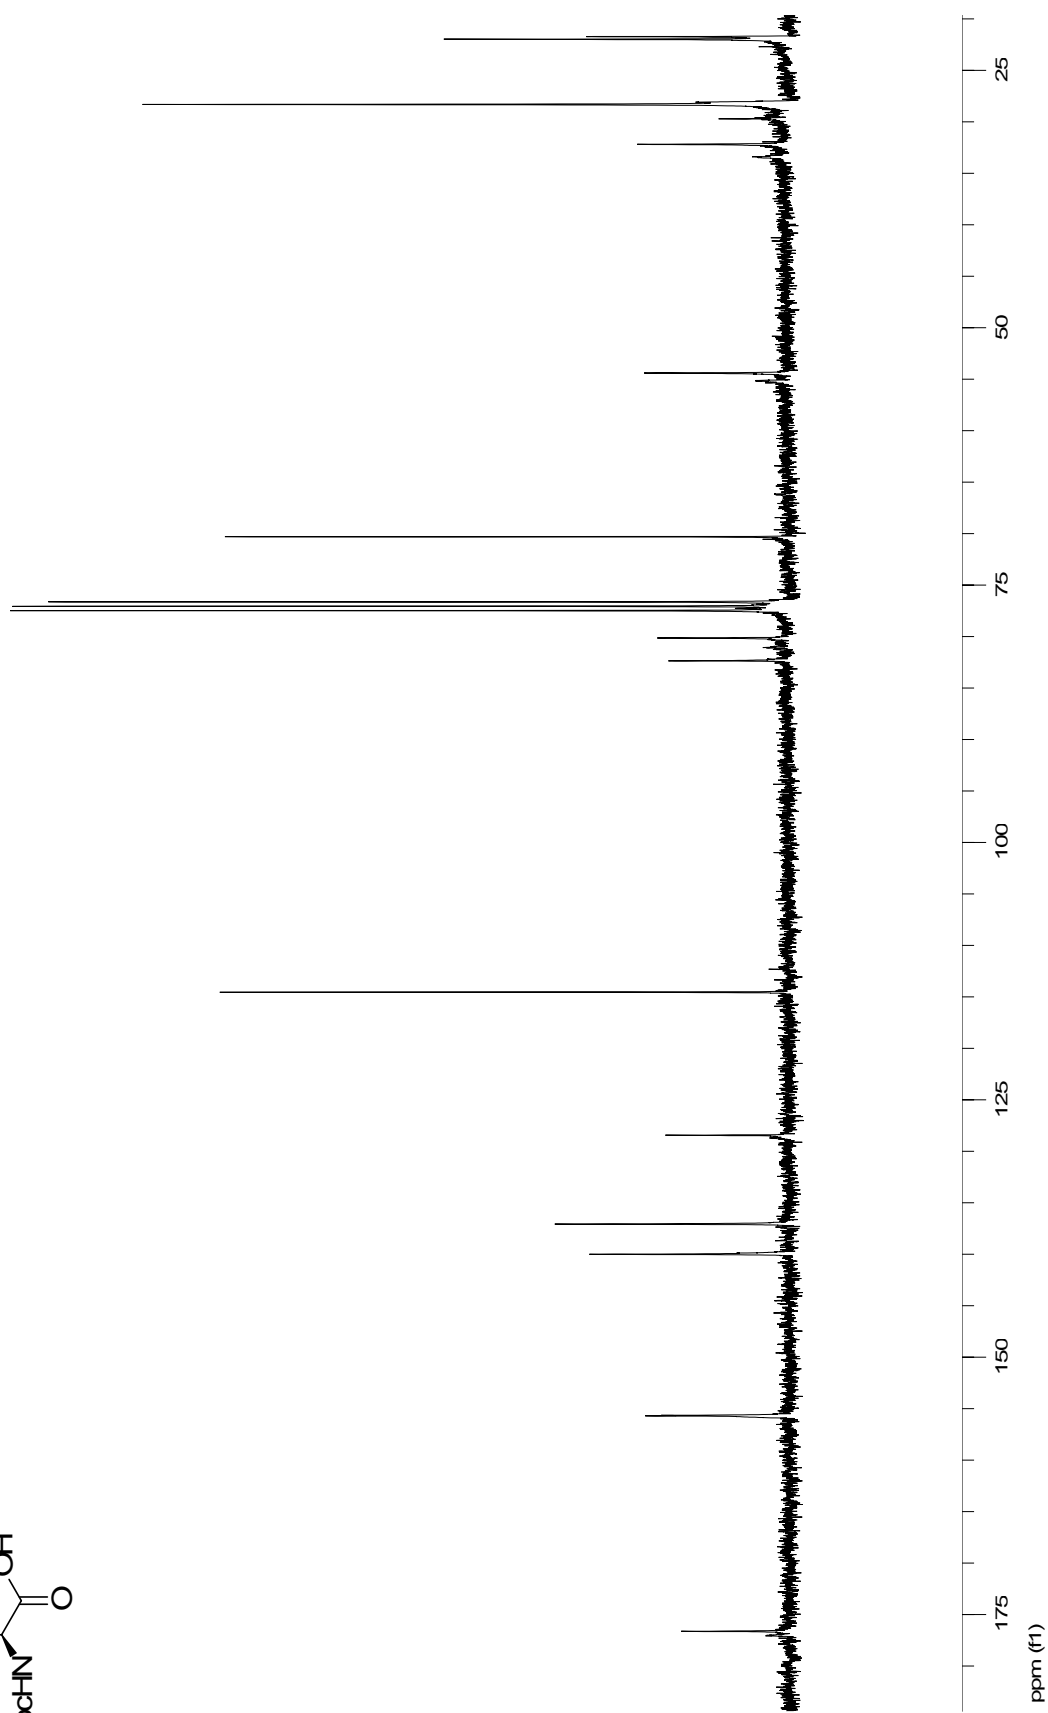



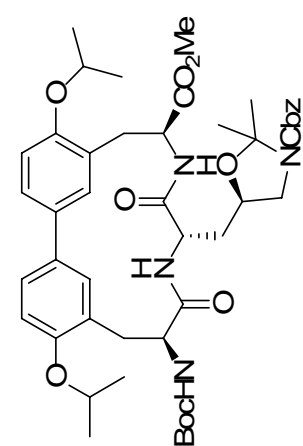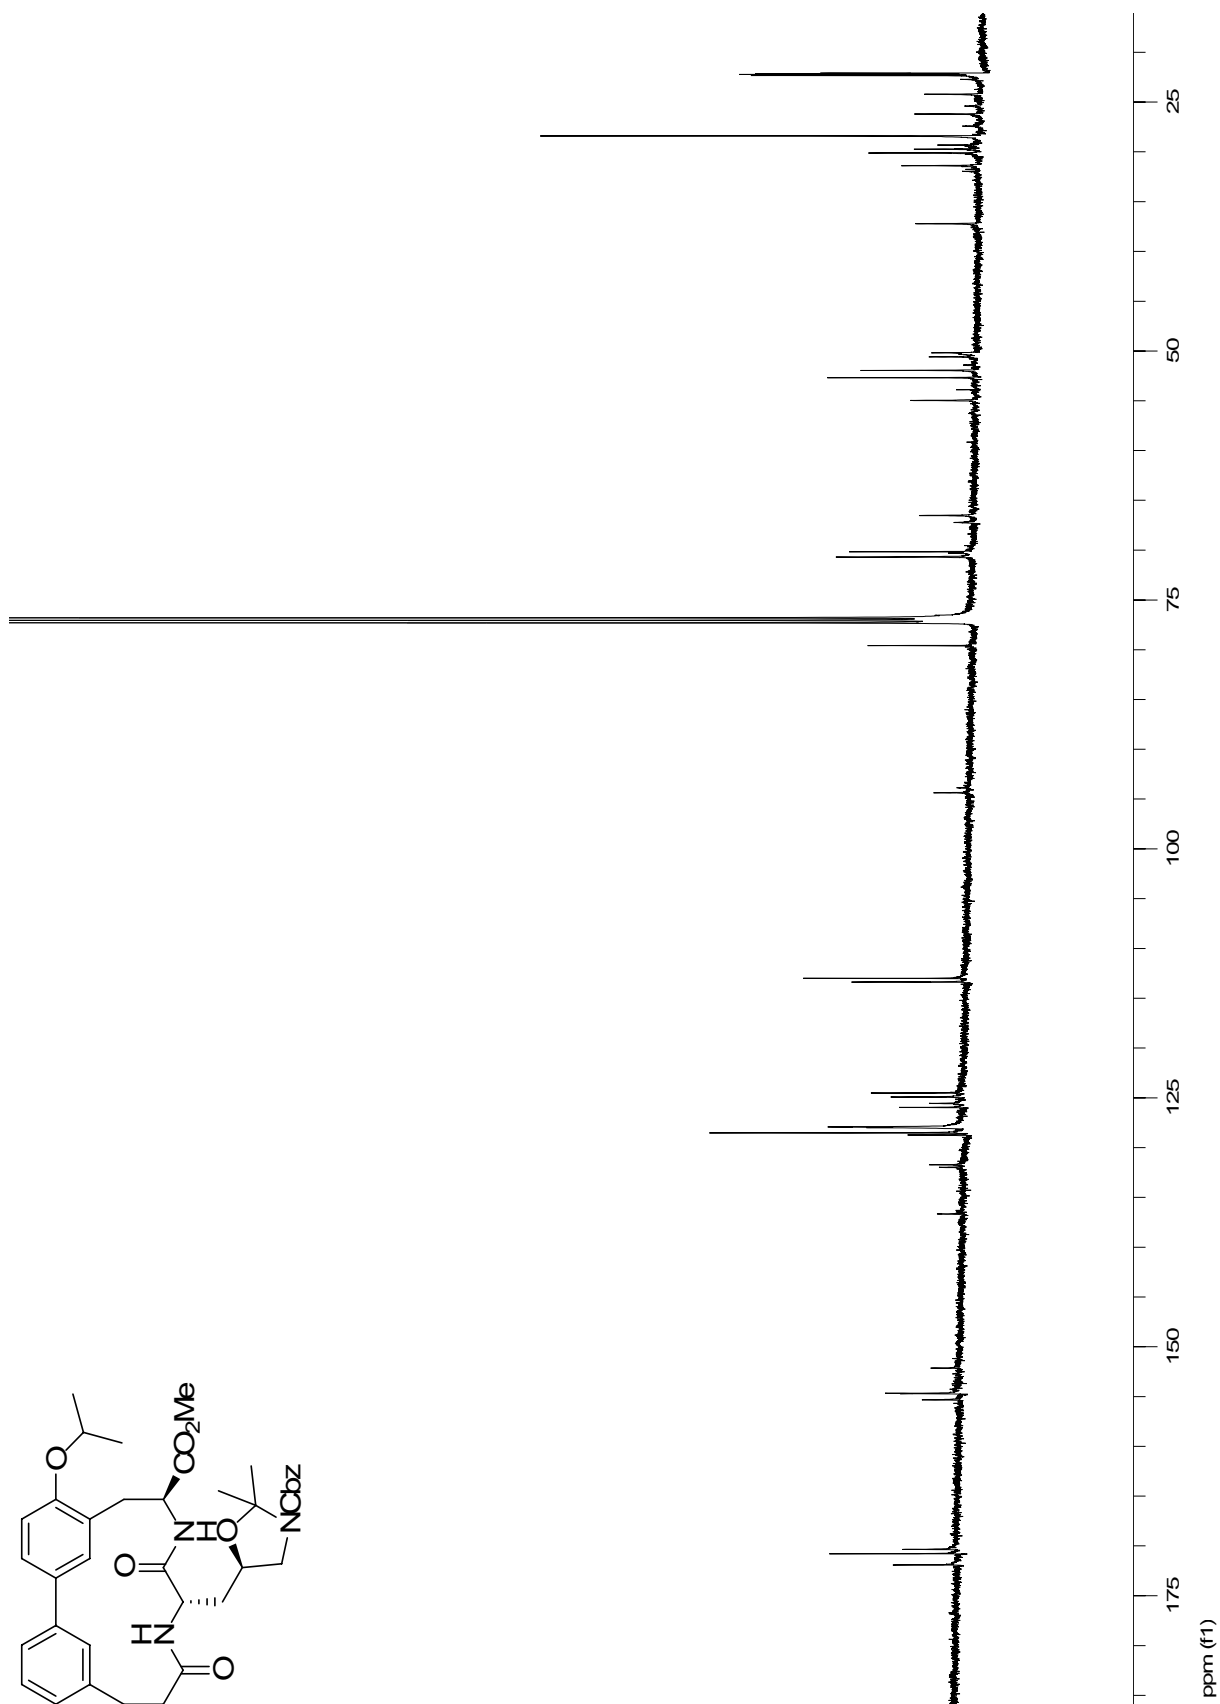



*Biphenamine B*  $\cdot 2\text{HCl}$   $\cdot 2\text{H}_2\text{O}$   
in  $\text{D}_2\text{O}$  (500 MHz)

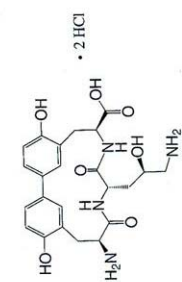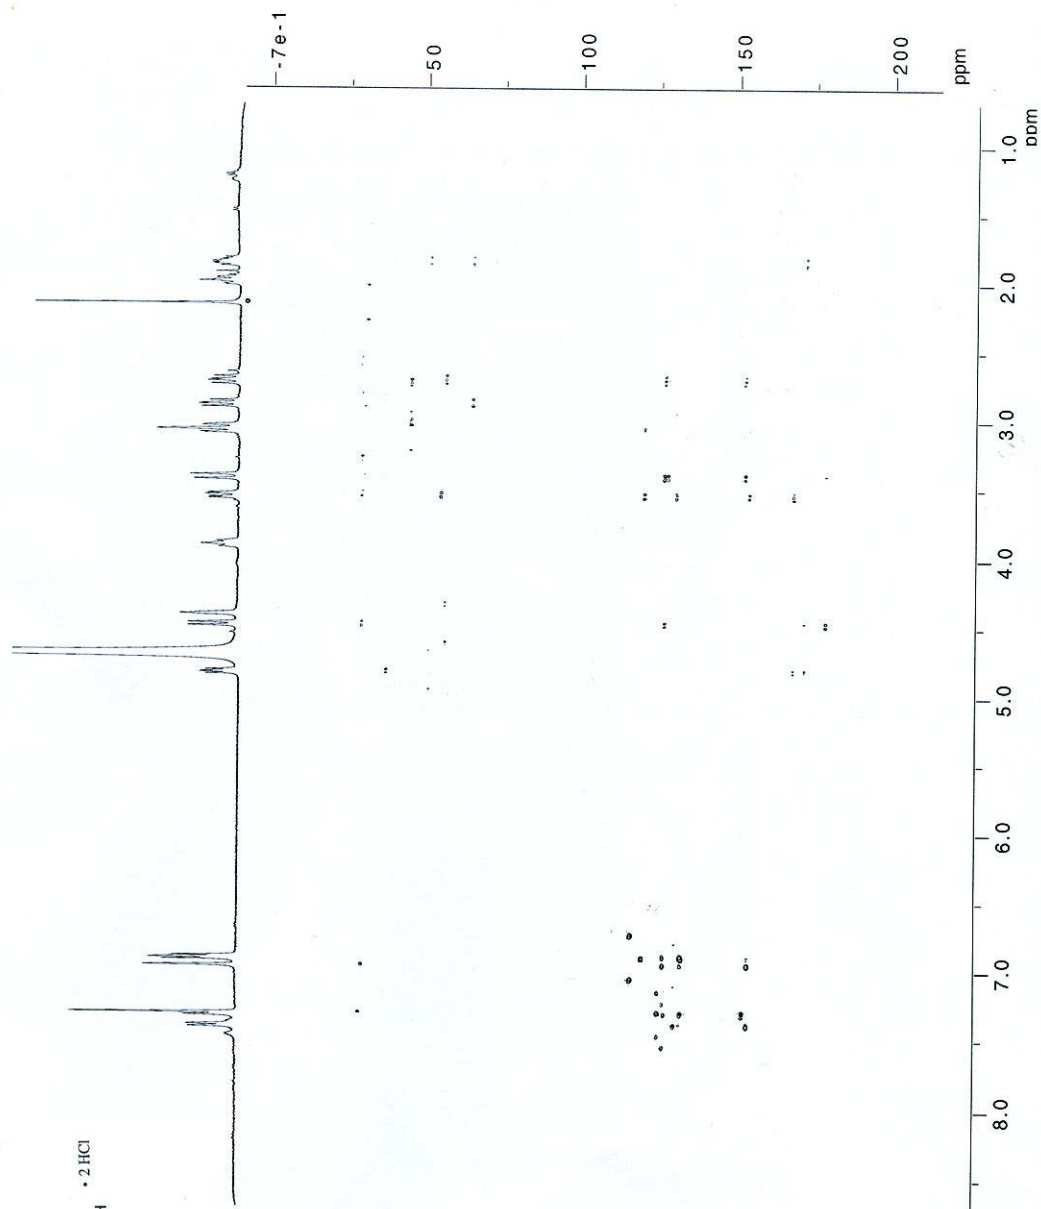

**Protected Biphenomycin B:**

retention time = 4.97 min.

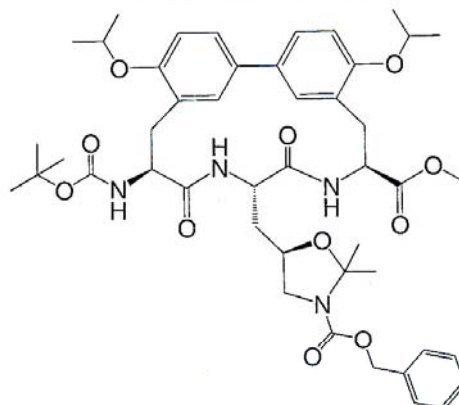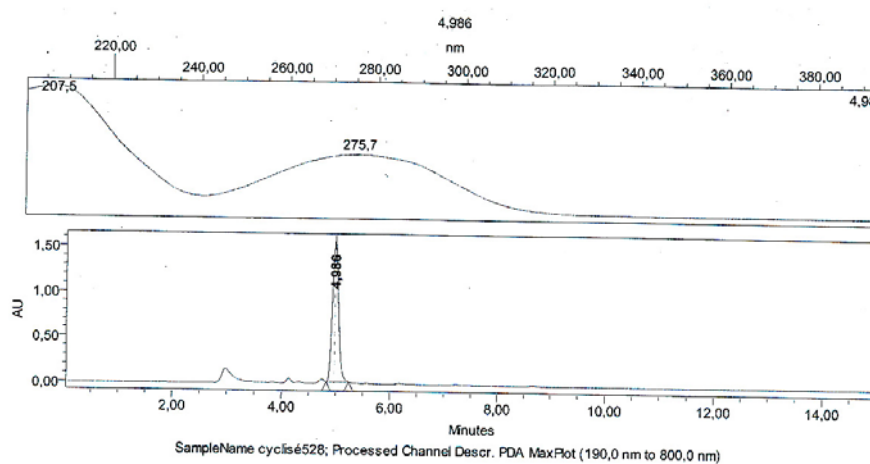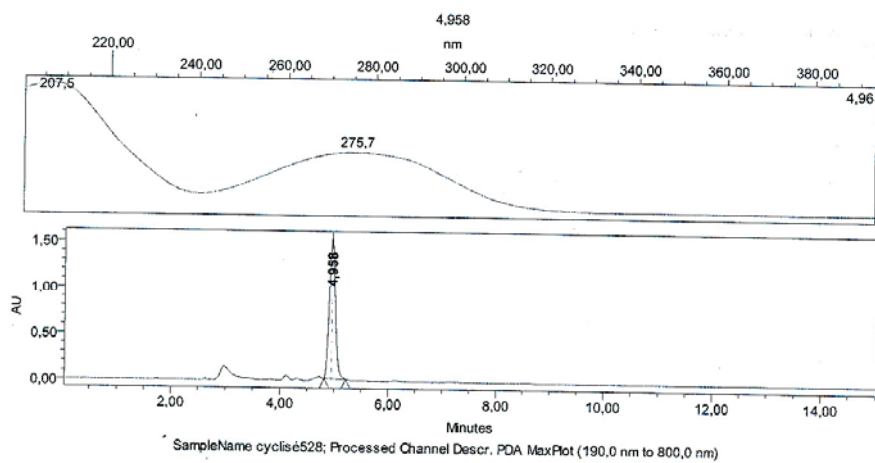

**Peak Results**  
SampleName: cyclis6528

| SampleName   | RT    | Area     | Height  | % Area |
|--------------|-------|----------|---------|--------|
| 1 cyclis6528 | 4.958 | 11906340 | 1516110 | 100,00 |
| 2 cyclis6528 | 4.986 | 12306061 | 1555268 | 100,00 |

|   | Time  | Flow | %A  | %B    | %C  | %D  | Curve |
|---|-------|------|-----|-------|-----|-----|-------|
| 1 | 0.01  | 1.00 | 5   | 95    | 0.0 | 0.0 | 6     |
| 2 | 20.00 | 1.00 | 0.0 | 100.0 | 0.0 | 0.0 | 6     |

A = H<sub>2</sub>O  
B = MeCN  
Column symmetry C18 4.6°250 mm

***Biphenomycin B*** :  
retention time = 7.37 min.

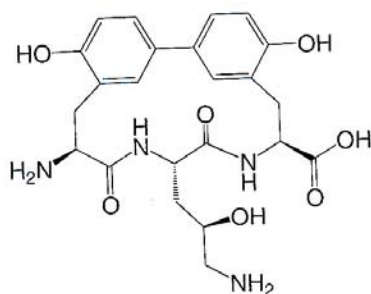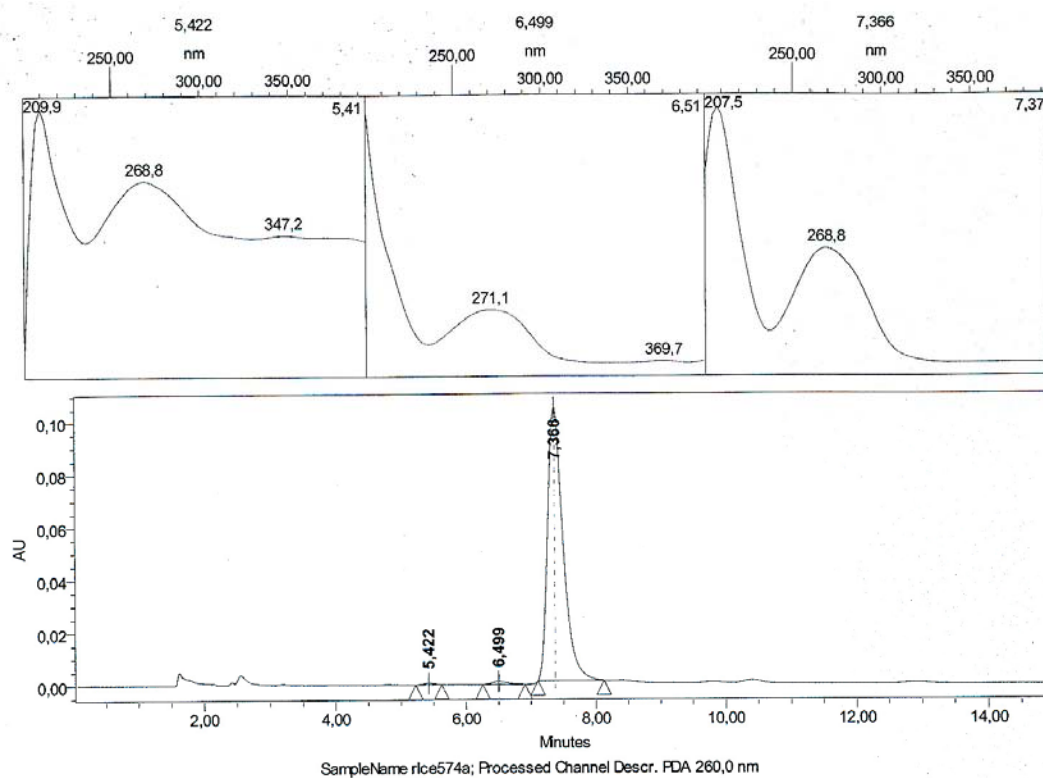

Time Flow %A %B %C %D Curve  
20 1.00 85 15 0.0 0.0 6

A = H<sub>2</sub>O + 0.1% TFA  
B = MeCN + 0.1% TFA  
Column symmetryshield C18 4.6\*150 mm

**Peak Results**  
SampleName: rice574a

|   | SampleName | RT    | Area    | Height | % Area |
|---|------------|-------|---------|--------|--------|
| 1 | rice574a   | 5.422 | 7405    | 665    | 0.42   |
| 2 | rice574a   | 6.499 | 19628   | 1192   | 1.12   |
| 3 | rice574a   | 7.366 | 1724159 | 104246 | 98.46  |
